# Supplementary material for: Well-defined degradable brush-coil block copolymers for intelligent release of insulin at physiological pH
Source: Royal Society of Chemistry journal article supplement (doi:10.1039/c6ra01495j), 2016-01-01
Supplement: c6ra01495j1.pdf [file c6ra01495j1.pdf]

Supporting information

**Well-Defined Degradable Brush-coil Block Copolymers for Intelligent Release of Insulin  
at Physiological pH**

**Xuan Zhang,<sup>a</sup> Liyuan Zhao,<sup>a</sup> Junjiao Yang,<sup>b</sup> Jing Yang<sup>a</sup>**

<sup>a</sup> State Key Laboratory of Chemical Resource, College of Life Science and Technology, Beijing University of Chemical Technology, Beijing 100029, China. <sup>b</sup> College of Science, Beijing University of Chemical Technology, Beijing 100029, China.

Corresponding author: E-mail: yangj@mail.buct.edu.cn, Tel: +86-10-64427578, Fax number:  
+86-10-64427578.

**Materials.** Cyclohexanone, *N*-bromosuccinimide (NBS), and 3-chloroperoxybenzoic acid (mCPBA) were purchased from Beijing Ouhe Chemical Industry Co. Ltd. (Beijing, China). NaHSO<sub>4</sub>/SiO<sub>2</sub> catalyst was fabricated according to the reported method.<sup>[1]</sup>

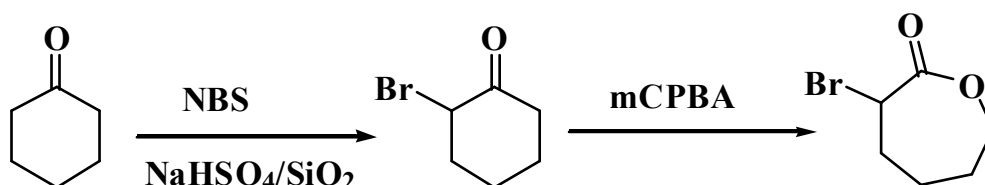

**Scheme S1.** Synthesis route of  $\alpha$ -BrCL

**Synthesis of  $\alpha$ -brominated caprolactone ( $\alpha$ -BrCL).** As shown in Scheme S1, according to the reported methods,<sup>[2]</sup> the preparation was described in the following. To a mixture of cyclohexanone (2.94 g, 30 mmol) and *N*-bromosuccinimide (4.45 g, 25 mmol) in Et<sub>2</sub>O (60 mL), NaHSO<sub>4</sub>/SiO<sub>2</sub> (2 g) as the catalyst was added. The mixture was stirred at room temperature for 4 h. The filtrate was washed five times with cold water. The collected organic phase was concentrated and purified by column chromatography over silica gel using petroleum ether-EtOAc (v:v = 20:1) as eluent to obtain  $\alpha$ -Br-cyclohexanone. <sup>1</sup>H NMR (400 MHz, CDCl<sub>3</sub>),  $\delta$  (ppm): 4.20 (m, 3H, -COO-CH<sub>2</sub>-, -COO-CH(Br)), 3.46-3.79 (m, 2H, -CH<sub>2</sub>-CH<sub>2</sub>-), 3.37 (s, 3H, -OCH<sub>3</sub>), 2.06 (m, 2H, -CH(Br)-CH<sub>2</sub>-), 1.71 (m, 2H, -CH<sub>2</sub>-CH<sub>2</sub>-OOC-), 1.45-1.58 (m, 2H, -CH<sub>2</sub>-); <sup>13</sup>C NMR (400 MHz, CDCl<sub>3</sub>),  $\delta$  (ppm): 202, 53.41, 38.20, 37.05, 27.03, 22.20.

$\alpha$ -Br-cyclohexanone (4.93 g, 28 mmol) and mCPBA (5.69 g, 33 mmol) was mixed in dried CH<sub>2</sub>Cl<sub>2</sub> (40 mL). The mixture was stirred at room temperature for 24 h. After filtration, the filtrate was washed three times with 5% Na<sub>2</sub>S<sub>2</sub>O<sub>3</sub> solution, saturated NaCl solution, cold water, respectively. The organic phase was concentrated and purified by column chromatography over silica gel using petroleum ether-EtOAc (v:v = 5:1) as eluent to afford  $\alpha$ -BrCL. <sup>1</sup>H NMR (400 MHz, CDCl<sub>3</sub>),  $\delta$  (ppm): 4.83 (t, 1H, -COO-CH(Br)), 4.69 (m, 1H, -COO-CH<sub>2</sub>-), 4.28 (m, 1H, -COO-CH<sub>2</sub>-), 2.13 (m, 2H, -CH(Br)-CH<sub>2</sub>-), 1.93-2.04 (m, 2H, -CH<sub>2</sub>-), 1.73-1.85 (m, 2H, -CH<sub>2</sub>-); <sup>13</sup>C NMR (400 MHz, CDCl<sub>3</sub>),  $\delta$  (ppm): 169.62, 69.87, 48.22, 32.01, 29.29, 25.24.

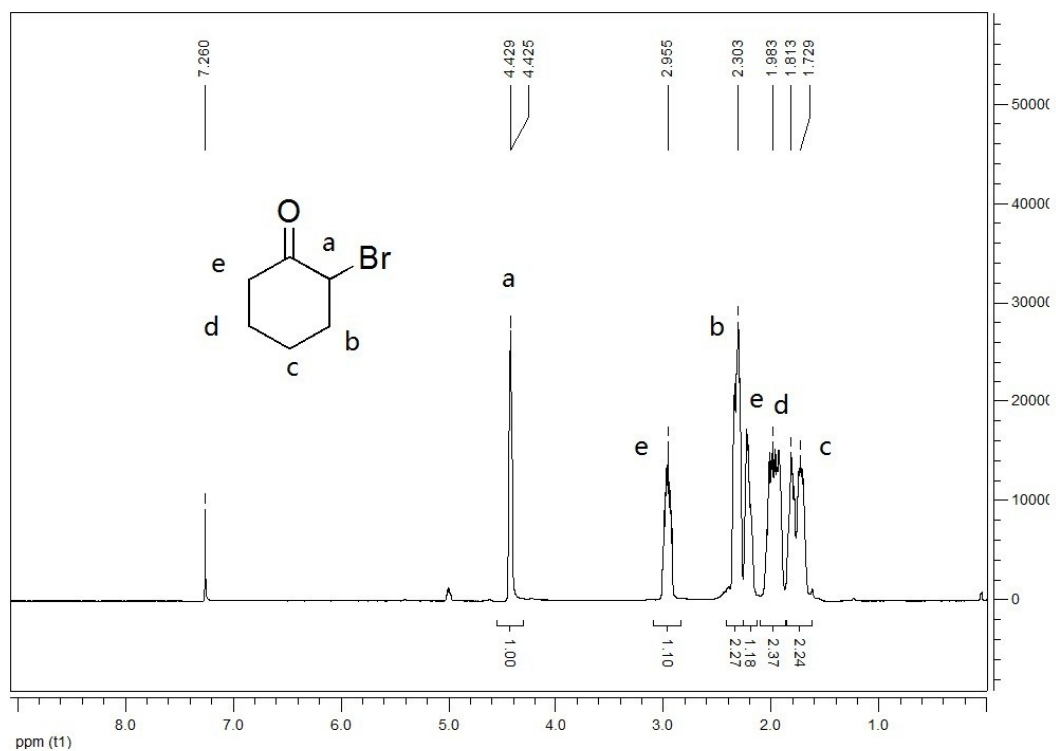

Figure S1.  $^1\text{H}$  NMR spectrum of  $\alpha$ -Br-cyclohexanone.

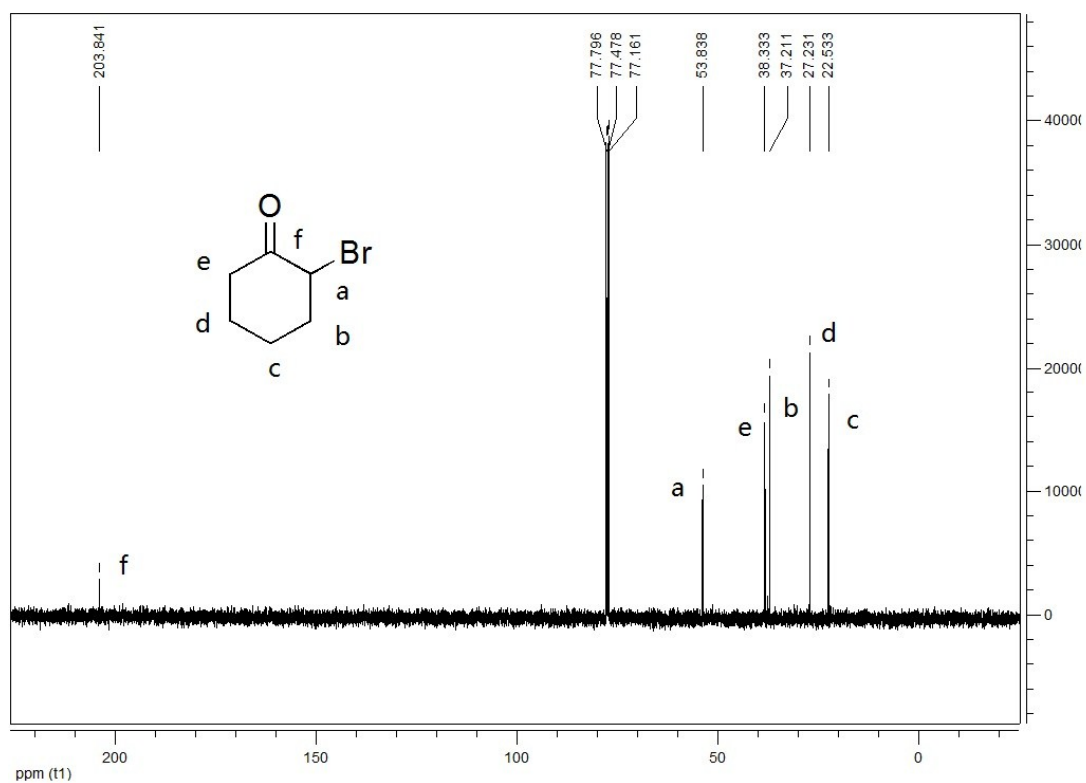

Figure S2.  $^{13}\text{C}$  NMR spectrum of  $\alpha$ -Br-cyclohexanone.

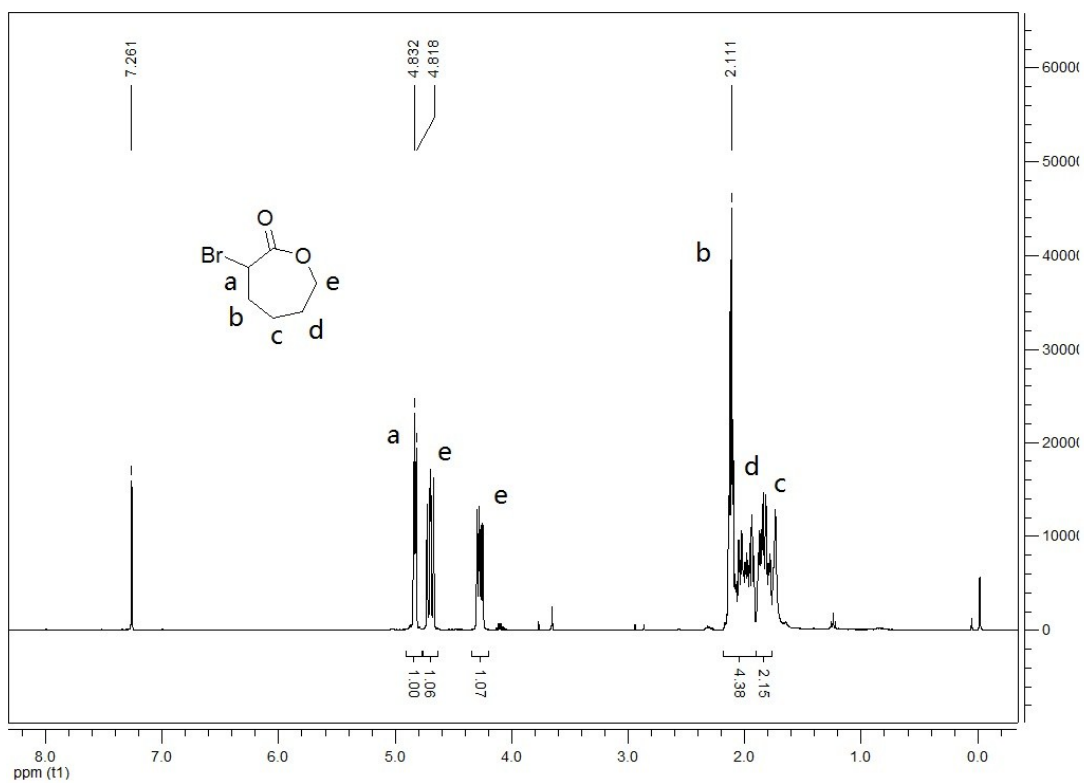

Figure S3.  $^1\text{H}$  NMR spectrum of  $\alpha$ -BrCL.

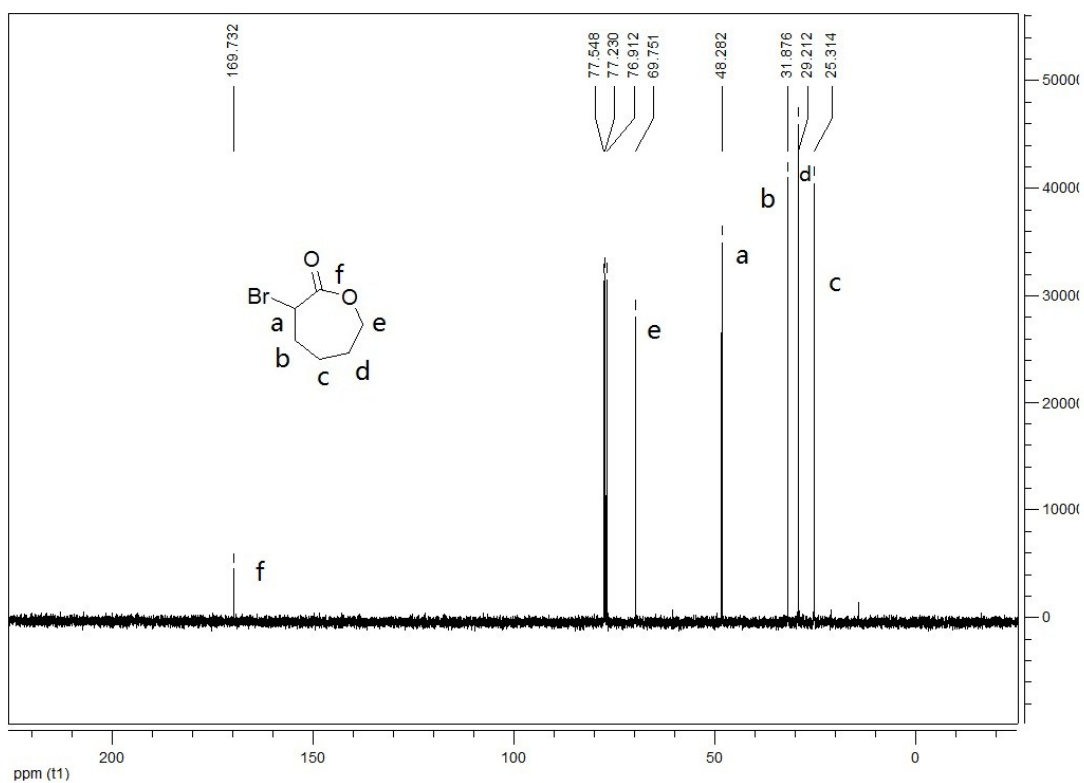

Figure S4.  $^{13}\text{C}$  NMR spectrum of  $\alpha$ -BrCL.

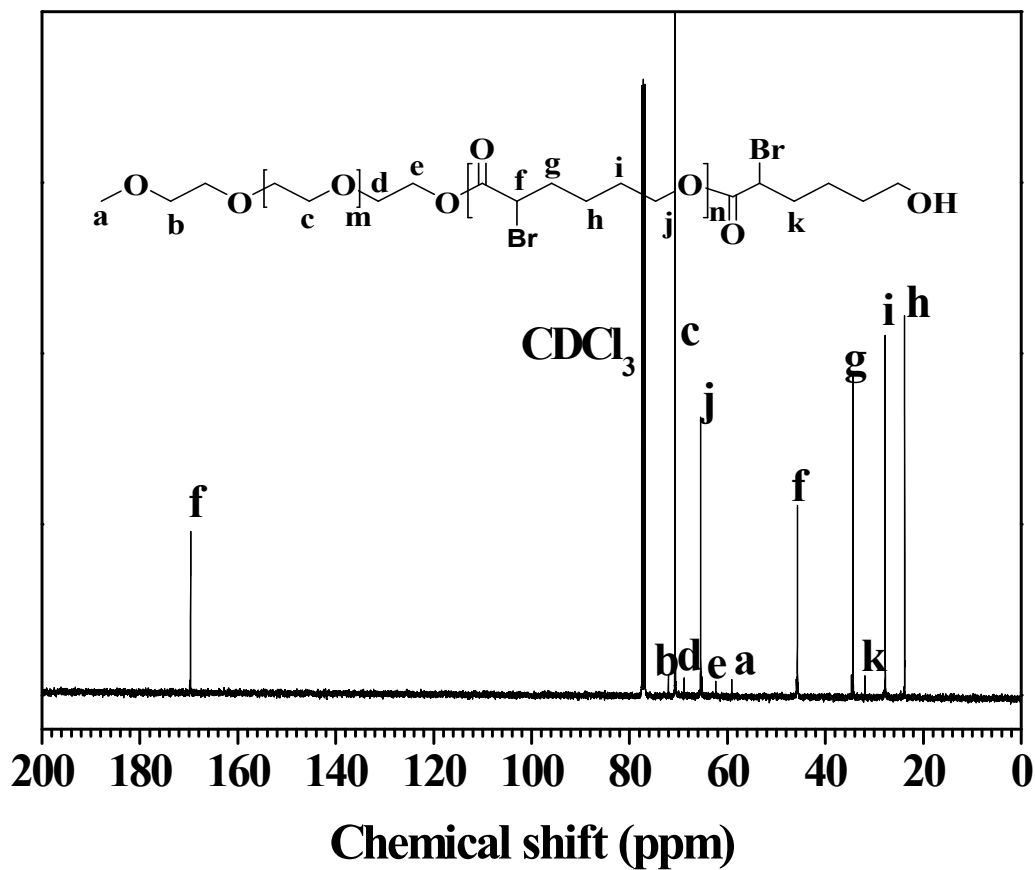

Figure S5. <sup>13</sup>C NMR spectrum of macroinitiator MPEG-*b*-PBrCL

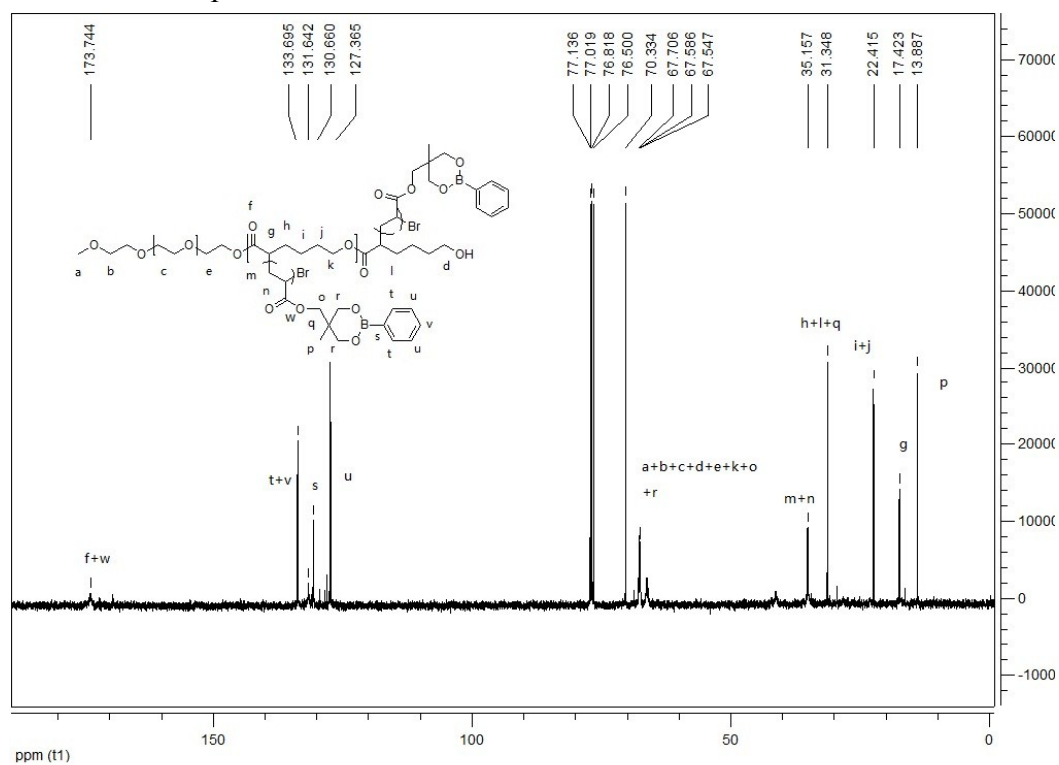

Figure S6. <sup>13</sup>C NMR spectrum of brush polymer MPEG-*b*-P(CL-*g*-PPBDMMMA)

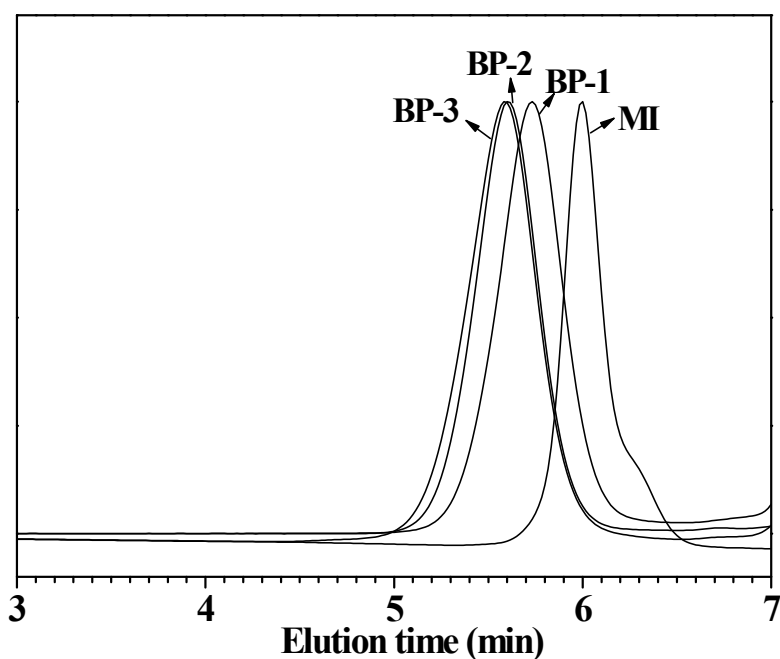

**Figure S7.** GPC curves of the brush polymers MPEG-*b*-P(CL-*g*-PPBDMMA) (BP-1~BP-3) and macroinitiator MPEG5000-*b*-PBrCL.

**The measurement of critical micellar concentration.** To estimate the CMCs of the brush polymers, pyrene was used as the fluorescence probe<sup>[3]</sup>. A predetermined amount of pyrene in acetone was added into a series of volumetric flasks, and the acetone was then evaporated completely. A predetermined volume of MPEG-*b*-P(CL-*g*-PPBDMMA) polymer solutions and ultrapurified water were added into the volumetric flasks consecutively to get solutions of different micelle concentrations ranging from  $5.0 \times 10^{-8}$  to  $2.5 \times 10^{-3}$  mg/L, while the concentration of pyrene in each flask was fixed at  $2.0 \times 10^{-6}$  mol/L. Fluorescence spectra were recorded on a Hitachi F-4600 fluorescence instrument (Hitachi High-Technologies Corporation, Tokyo Japan) at 395 nm excitation wavelength and 5 nm slit width.

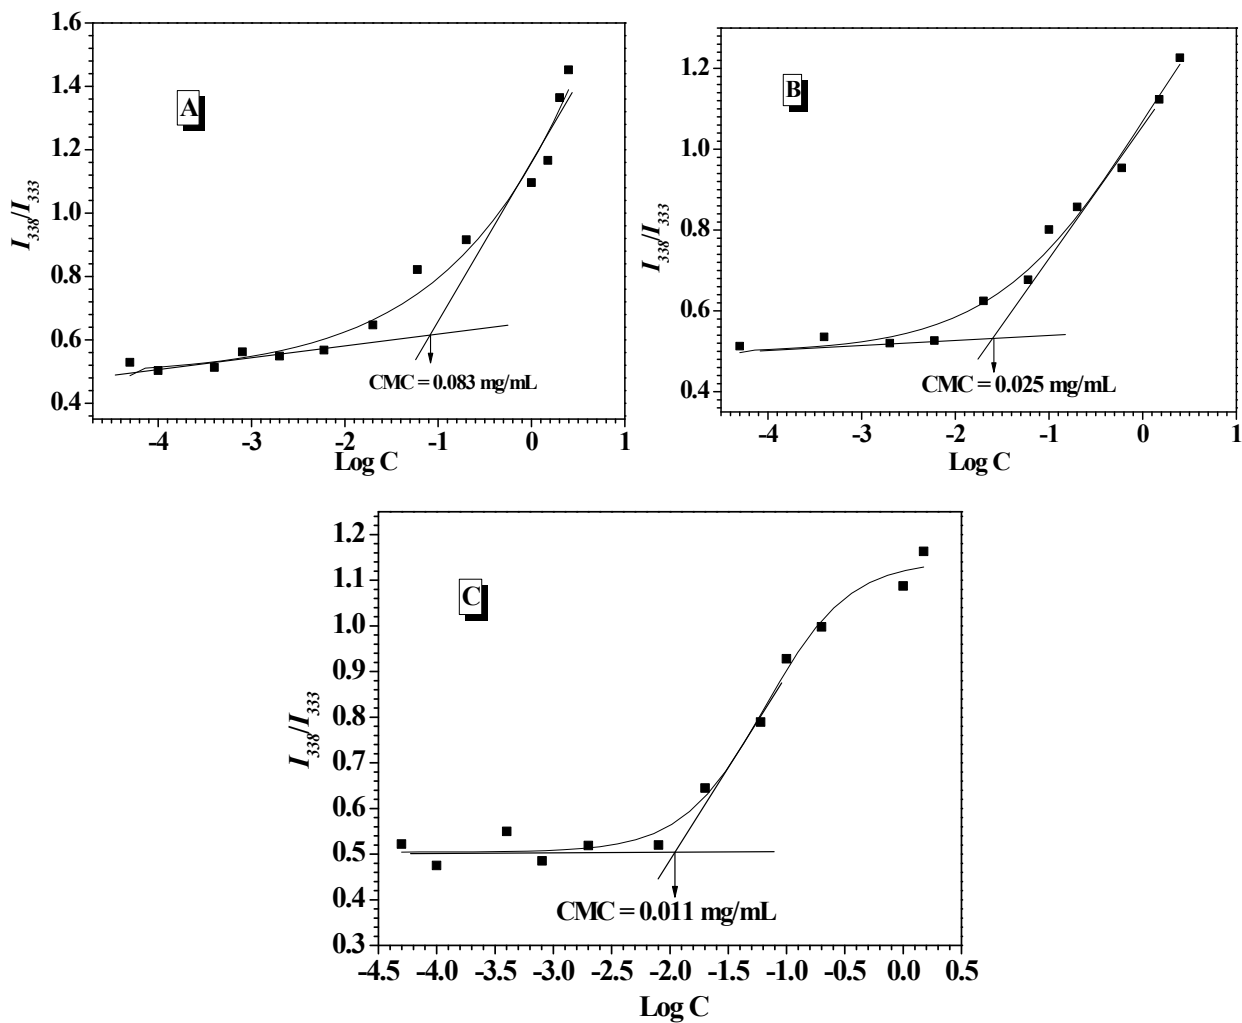

Figure S8. CMC curves of BP-1(A); BP-2 (B); BP-3 (C).

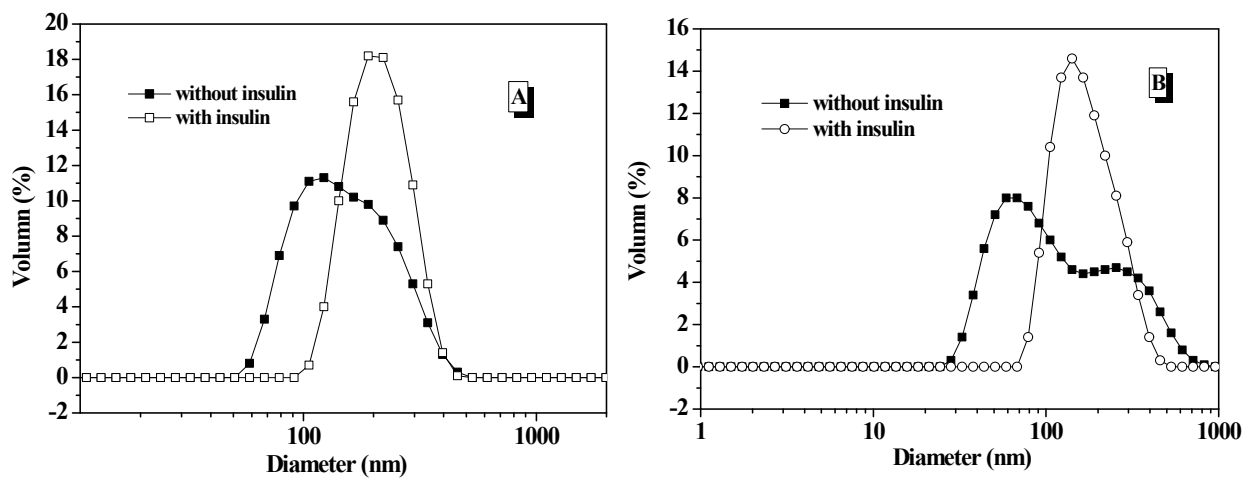

Figure S9. Diameter of polymeric micelles from BP-2 (A) and BP-3 (B) without and with insulin.

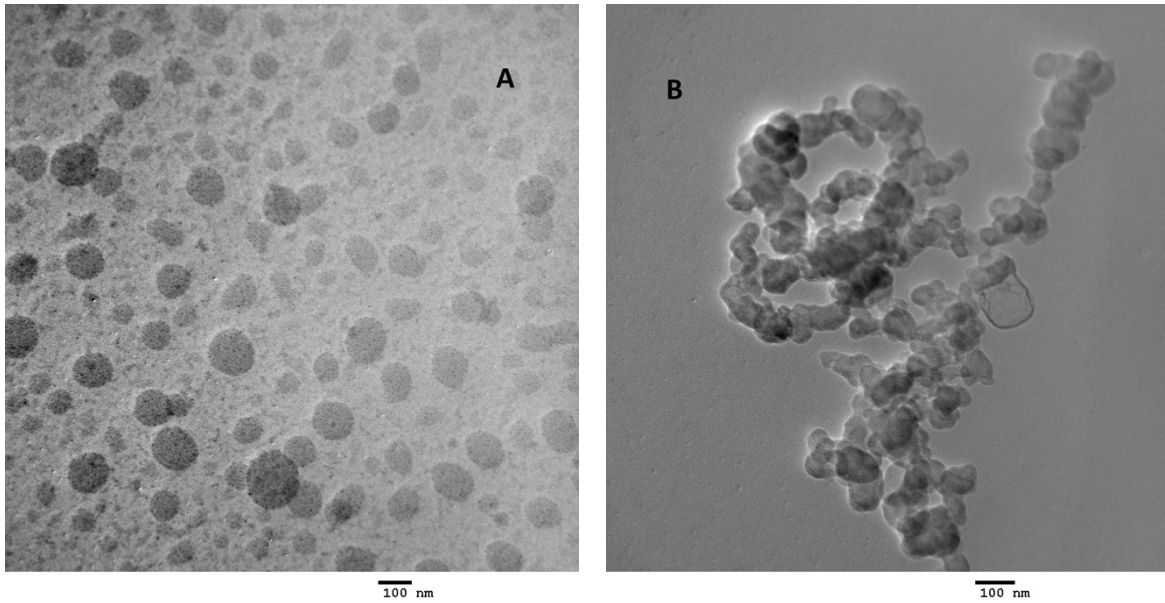

**Figure S10.** TEM images of BP-2 (A) and BP-3 (B).

**Standard curve of FITC-insulin.** FITC-insulin varying concentration from 0.2 to 8.0  $\mu\text{g/mL}$  was prepared in 0.15 M PBS (pH = 7.4), and the emission intensity was measured by fluorescence spectroscopy at an emission wavelength of 525 nm upon excitation at 494 nm.

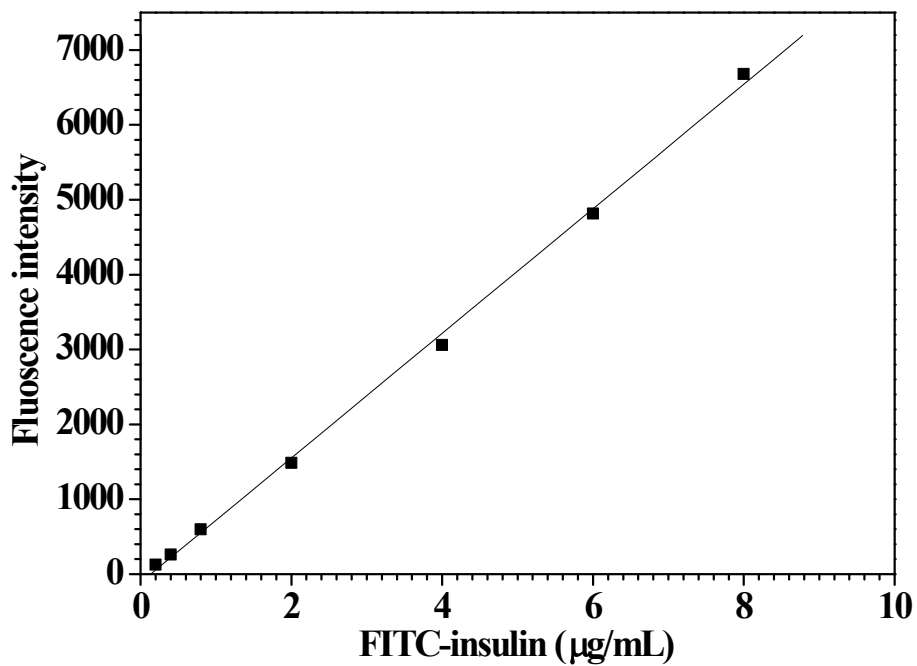

**Figure S11.** Standard curve of fluorescence intensity at various concentration of FITC-insulin.



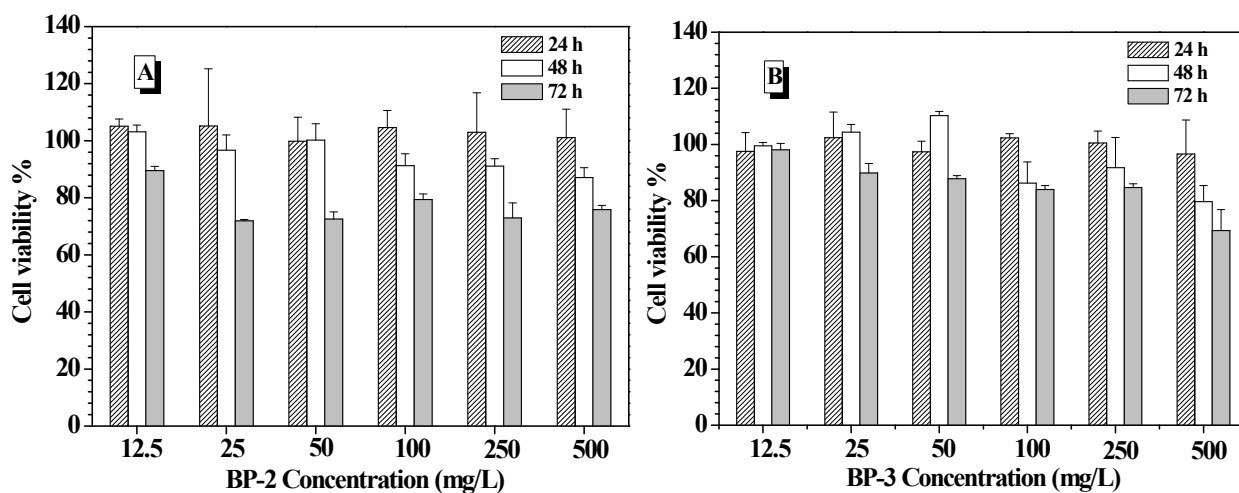

**Figure S12.** Cell viability assay in NIH3T3 mouse fibroblast cell lines. The cells were treated with polymeric micelles formed from BP-2 (A) and BP-3 (B) at various concentrations at 37 °C for 24, 48 and 72 h, respectively.

## References

- [1] Breton, G, W. *J. Org. Chem.* **1997**, *62*, 8952-8954
- [2] Alam, M. Mujahid; Varala, Ravi; Adapa, Srinivas R. *Synthetic commun.* **2003**, *33*, 3035-3040.
- [3] Yao, Y.; Wang, X. M.; Tan, T. W.; Yang, J. *Soft Matter.* **2011**, *7*, 7948-7951.
